# Supplementary material for: Small/Kiddie Cigarette Packaging Size and Its Impact on Smoking: A Systematic Review
Source: MDPI journal article supplement (doi:10.3390/ijerph191912051), 2022-09-23
Supplement: s1 [file s1]

**Table S3.** Results of the included studies based on the QATSDD.

| Study                                           | Theory | Aims/<br>Objectives | Setting | Sample<br>Size | Sample<br>Represent | DC<br>Procedures | DC Tools | Recruitme<br>nt Data | Assess Rel<br>& Validity<br>(Quant<br>Only) | Fit: RQ<br>and DC<br>(Quant<br>Only) | Fit: RQ ad<br>DC (Qual<br>Only) | Fit: RQ<br>and<br>Analysis | Justify<br>Analysis | Reliability<br>Analysis<br>(Qual<br>Only) | User<br>Involvement | Strengths<br>and<br>Limitations | Total<br>and % of<br>Highest<br>Possible<br>Score |
|-------------------------------------------------|--------|---------------------|---------|----------------|---------------------|------------------|----------|----------------------|---------------------------------------------|--------------------------------------|---------------------------------|----------------------------|---------------------|-------------------------------------------|---------------------|---------------------------------|---------------------------------------------------|
| Burke<br>Marketing<br>Research<br>(1983) [39]   | 2      | 3                   | 3       | 1              | 1                   | 2                | 1        | 2                    | 0                                           | 1                                    | -                               | 1                          | 1                   | -                                         | 0                   | 0                               | 19/42 =<br>45%                                    |
| Carter (1986)<br>[36]                           | 1      | 3                   | 3       | 3              | 1                   | 2                | 1        | 0                    | -                                           | -                                    | 1                               | 0                          | 0                   | 0                                         | 0                   | 0                               | 15/42 =<br>36%                                    |
| Causey (1982)<br>[46]                           | 2      | 2                   | 2       | 2              | 1                   | 2                | 1        | 0                    | -                                           | -                                    | 0                               | 1                          | 1                   | 0                                         | 0                   | 0                               | 14/42 =<br>33.3%                                  |
| Curtis (1985)<br>[35]                           | 0      | 3                   | 3       | 0              | 0                   | 3                | 1        | 0                    | -                                           | -                                    | 1                               | 0                          | 0                   | 0                                         | 0                   | 0                               | 11/42 =<br>26%                                    |
| Cox (1983) [43]                                 | 1      | 1                   | 1       | 0              | 0                   | 1                | 0        | 0                    | -                                           | -                                    | 0                               | 1                          | 0                   | 0                                         | 0                   | 1                               | 6/42 = 14%                                        |
| Ellisom<br>Quarterly<br>Research<br>(1991) [44] | 1      | 1                   | 3       | 1              | 1                   | 1                | 0        | 0                    | -                                           | -                                    | 1                               | 1                          | 1                   | 0                                         | 0                   | 0                               | 11/42 =<br>26%                                    |
| Farrel, Fry &<br>Harrus (2011)<br>[31]          | 3      | 3                   | 3       | 2              | 3                   | 3                | 3        | 2                    | 3                                           | 1                                    | -                               | 2                          | 2                   | -                                         | 0                   | 1                               | 31/42 =<br>74%                                    |
| Generation<br>Idea (1986) [40]                  | 1      | 1                   | 3       | 0              | 0                   | 2                | 0        | 0                    | -                                           | -                                    | 0                               | 0                          | 0                   | 0                                         | 0                   | 0                               | 7/42 = 17%                                        |
| Gomez&<br>Guara (1993)<br>[28]                  | 0      | 2                   | 3       | 0              | 0                   | 1                | 1        | 0                    | 0                                           | 0                                    | -                               | 0                          | 0                   | -                                         | 0                   | 0                               | 7/42 = 17%                                        |
| Gomez&<br>Morales (1996)<br>[38]                | 2      | 3                   | 3       | 3              | 2                   | 2                | 1        | 1                    | 1                                           | 3                                    | -                               | 0                          | 1                   | -                                         | 1                   | 0                               | 23/42 =<br>55%                                    |
| Levy & Wood<br>(1995) [32]                      | 1      | 2                   | 3       | 0              | 0                   | 2                | 0        | 0                    | -                                           | -                                    | 2                               | 1                          | 0                   | 0                                         | 0                   | 2                               | 13/42 =<br>31%                                    |
| Lopez (1992)<br>[33]                            | 0      | 3                   | 3       | 0              | 0                   | 1                | 1        | 0                    | -                                           | -                                    | 1                               | 0                          | 0                   | 0                                         | 0                   | 0                               | 9/42 = 21%                                        |
| Marti &<br>Sindelar (2015)<br>[30]              | 3      | 3                   | 3       | 0              | 1                   | 3                | 2        | 3                    | 2                                           | 3                                    | -                               | 3                          | 3                   | -                                         | 0                   | 1                               | 30/42 =<br>71%                                    |

|                                                     |      |      |      |      |      |      |      |      |      |      |      |      |      |     |     |      |               |
|-----------------------------------------------------|------|------|------|------|------|------|------|------|------|------|------|------|------|-----|-----|------|---------------|
| Market Research Document (1991) [41]                | 1    | 2    | 3    | 1    | 0    | 1    | 1    | 0    | -    | -    | 0    | 0    | 0    | 0   | 0   | 1    | 10/42 = 24%   |
| Shai Balaban Dickinson Research Inc (n.d) [42]      | 1    | 2    | 3    | 2    | 0    | 1    | 1    | 0    | -    | -    | 0    | 1    | 1    | 0   | 0   | 0    | 12/42 = 29%   |
| Stern D (1990) [45]                                 | 2    | 3    | 2    | 2    | 1    | 2    | 1    | 0    | -    | -    | 0    | 0    | 0    | 0   | 0   | 1    | 14/42 = 33.3% |
| Office of Tobacco Control(2006) [18]                | 2    | 2    | 3    | 3    | 3    | 1    | 0    | 0    | 0    | 3    | -    | 3    | 0    | 0   | 0   | 2    | 22/42 = 52%   |
| Warner PA Assoc (1990) [37]                         | 1    | 3    | 3    | 2    | 0    | 1    | 1    | 1    | -    | -    | 1    | 0    | 0    | 0   | 0   | 1    | 14/42 = 33%   |
| Warner PA Assoc (1990) [37]                         | 2    | 3    | 3    | 0    | 0    | 1    | 0    | 0    | -    | -    | 2    | 0    | 0    | 0   | 0   | 0    | 11/42 = 26%   |
| Wilson et al. (1987) [21]                           | 2    | 2    | 3    | 3    | 3    | 1    | 1    | 1    | 0    | 0    | -    | 3    | 2    | -   | 0   | 0    | 21/42 = 50 %  |
| Wolf (1993) [34]                                    | 0    | 3    | 3    | 0    | 0    | 1    | 1    | 0    | -    | -    | 1    | 0    | 0    | 0   | 0   | 0    | 9/42 = 21 %   |
| % of maximum possible score obtained for all papers | 44.4 | 81.0 | 93.7 | 39.7 | 27.0 | 55.6 | 30.2 | 17.5 | 28.6 | 66.7 | 23.8 | 27.0 | 20.6 | 0.0 | 1.6 | 15.9 |               |

## References

1. World Health Organization. Global Health Observatory (GHO) Data: Tobacco Control: Prevalence of Tobacco Smoking. Available online: <http://www.who.int/gho/tobacco/use/en/> (accessed on 2 May 2022).
2. Organization, W.H. Tobacco Free Initiative (TFI): WHO Global Report on Trends in Tobacco Smoking 2000–2025—First Edition. Available online: <https://www.who.int/tobacco/publications/surveillance/reportontrendstobaccosmoking/en/> (accessed on 3 July 2022).
3. Hecht, S.S.; Hatsukami, D.K. Smokeless tobacco and cigarette smoking: Chemical mechanisms and cancer prevention. *Nat. Rev. Cancer* **2022**, *22*, 143–155. <https://doi.org/10.1038/s41568-021-00423-4>.
4. World Health Organization. Tobacco. Available online: <https://www.who.int/news-room/fact-sheets/detail/tobacco> (accessed on 21 August 2021).
5. Singh, S.; Singh, J.; Biradar, B.; Sonam, M.; Chandra, S.; Samadi, F. Evaluation of salivary oxidative stress in oral lichen planus using malonaldehyde. *J. Oral Maxillofac. Pathol.* **2017**, *26*, 26–30. [https://doi.org/10.4103/jomfp.jomfp\\_333\\_21](https://doi.org/10.4103/jomfp.jomfp_333_21).

6. Dewhirst, T. Package size matters: Tobacco packaging, retail merchandising and its influence on trial and impulse sales. *Tob. Control* **2018**, *27*, 600–602. <https://doi.org/10.1136/tobaccocontrol-2017-053962>.
7. U. S. Department of Health Human Services. Reducing Tobacco Use: A Report of the Surgeon General. Available online: <https://health.gov/healthypeople/tools-action/browse-evidence-based-resources/reducing-tobacco-use-report-surgeon-general> (accessed on 2 February 2022).
8. Tobacco Industry Watch: Southeast Asia Tobacco Control Alliance. Malaysia: TI plays Word Game to Roll Back Ban on Kiddie Packs. Available online: <https://tobaccowatch.seatca.org/index.php/2017/09/10/malaysia-ti-plays-word-game-to-roll-back-ban-on-kiddie-packs/> (accessed on 4 April 2022).
9. Tobacco, B.A. The Sensible Regulation of Tobacco-British American Tobacco's Views. Available online: <http://legacy.library.ucsf.edu/tid/zye51a99/pdf> (accessed on 3 March 2020).
10. Lee, I.; Blackwell, A.K.M.; Scollo, M.; De-Loyde, K.; Morris, R.W.; Pilling, M.A.; Hollands, G.J.; Wakefield, M.; Munafò, M.R.; Marteau, T.M. Cigarette pack size and consumption: An adaptive randomised controlled trial. *BMC Public Health* **2021**, *21*, 1420. <https://doi.org/10.1186/s12889-021-11413-4>.
11. Chaloupka, F.; Warner, K.E. The economics of smoking. In *Handbook of Health Economics*; Culyer, A.J., Newhouse, J.P., Eds.; Elsevier: Amsterdam, The Netherlands, 2000; Volume 1, pp. 1539–1627.
12. Jha, P.; Chaloupka, F.J. *Tobacco Control in Developing Countries*; Oxford University Press: Oxford, UK, 2000.
13. World Health Organization. *WHO Report on the Global Tobacco Epidemic, 2008: The MPOWER Package*; WHO: Geneva, Switzerland, 2008.
14. World Health Organization, Region Office for South-East Asia. Global Youth Tobacco Survey (GYTS): Indonesia Report, 2014. Available online: <https://apps.who.int/iris/handle/10665/205148> (accessed on 20 August 2021).
15. Astuti, P.A.S.; Freeman, B. Protecting Young Indonesian Hearts from Tobacco. Available online: <https://theconversation.com/protecting-young-indonesian-hearts-from-tobacco-97554> (accessed on 19 August 2021).
16. Southeast Asia Tobacco Control Alliance. A Snapshot of the Tobacco Industry in ASEAN Region Bangkok: Southeast Asia Tobacco Control. Available online: <https://seatca.org/dmdocuments/TI%20Snapshot%202019.pdf> (accessed on 6 July 2021).
17. Southeast Asia Tobacco Control Alliance. Keep the Ban on 'Kiddie Packs' to Save our Children—National Cancer Society Malaysia. Available online: <https://seatca.org/keep-the-ban-on-kiddie-packs-to-save-our-children-national-cancer-society-malaysia/> (accessed on 20 August 2021).
18. Office of Tobacco Control. *Children, Youth and Tobacco: Behaviour, Perceptions and Public Attitudes*; Office of Tobacco Control: Naas, Ireland, 2006.
19. World Health Organization. WHO Framework Convention on Tobacco Control. Available online: <http://apps.who.int/iris/bitstream/handle/10665/42811/9241591013.pdf?sequence=1> (accessed on 1 January 2022).
20. Lal, P.; Kumar, R.; Ray, S.; Sharma, N.; Bhattacharya, B.; Mishra, D.; Sinha, M.K.; Christian, A.; Rathinam, A.; Singh, G. The Single Cigarette Economy in India—A Back of the Envelope Survey to Estimate its Magnitude. *Asian Pac. J. Cancer Prev. APJCP* **2015**, *16*, 5579–5582. <https://doi.org/10.7314/apjcp.2015.16.13.5579>.
21. Wilson, D.H.; Wakefield, M.A.; Esterman, A.; Baker, C.C. 15's: They fit in everywhere--especially the school bag: A survey of purchases of packets of 15 cigarettes by 14 and 15 year olds in South Australia. *Community Health Stud.* **1987**, *11*, 16s–20s. <https://doi.org/10.1111/j.1753-6405.1987.tb00508.x>.
22. Cunningham, R. Smoke and Mirrors. Available online: <http://hdl.handle.net/10625/14226> (accessed on 10 March 2021).
23. Tan, Y.; Dorotheo, U. The Tobacco Control Atlas: ASEAN Region. Available online: <https://aseantobaccocontrolatlas.org/> (accessed on 20 November 2021).
24. Bernama. *No To Kiddie Pack Cigarettes—Dr Subramaniam*; Bernama: Federal Territory of Kuala Lumpur, Malaysia, 2018.
25. Hollands, G.J.; Shemilt, I.; Marteau, T.M.; Jebb, S.A.; Lewis, H.B.; Wei, Y.; Higgins, J.; Ogilvie, D. Portion, package or tableware size for changing selection and consumption of food, alcohol and tobacco. *Cochrane Database Syst. Rev.* **2015**, *2017*, CD011045. <https://doi.org/10.1002/14651858.CD011045.pub2>.
26. Persoskie, A.; Donaldson, E.A.; Ryant, C. How tobacco companies have used package quantity for consumer targeting. *Tob. Control* **2018**, *28*, 365–373. <https://doi.org/10.1136/tobaccocontrol-2017-053993>.
27. Mat Rifin, H.; Rodzlan Hasani, W.S.; Ling, M.Y.J.; Robert Lourdes, T.G.; Saminathan, T.A.; Ab Majid, N.L.; Ahmad, A.; Ismail, H.; Mohd Yusoff, M.F. A systematic review protocol on small/kiddie cigarette packaging size and its impact on smoking. *Syst. Rev.* **2020**, *9*, 13. <https://doi.org/10.1186/s13643-019-1263-6>.
28. Gomez, M.L.; Guevara, M. Consumer Research Report. 1993. Available online: <https://www.industrydocuments.ucsf.edu/docs/rtpy0013> (accessed on 28 November 2021).

29. Blackwell, A.K.M.; Lee, I.; Scollo, M.; Wakefield, M.; Munafo, M.R.; Marteau, T.M. Should cigarette pack sizes be capped? *Addiction* **2020**, *115*, 802–809. <https://doi.org/10.1111/add.14770>.
30. Marti, J.; Sindelar, J. Smaller Cigarette Pack as a Commitment to Smoke Less? Insights from Behavioral Economics. *PLoS ONE* **2015**, *10*, e0137520. <https://doi.org/10.1371/journal.pone.0137520>.
31. Farrell, L.; Fry, T.R.L.; Harris, M.N. 'A pack a day for 20 years': Smoking and cigarette pack sizes. *Appl. Econ.* **2011**, *43*, 2833–2842. <https://doi.org/10.1080/00036840903389838>.
32. Levy, J., Wood, D. *10's in-Depth Interviews-950817*; Philip Morris: New York, NY, USA, 1995.
33. Lopez, A. Virginia Slims Promotion and Advertising Study—Flash Report. 1992. Available online: <https://www.industrydocuments.ucsf.edu/docs/lybn0105> (accessed on 10 March 2022).
34. Wolf, M. Special 10's Qualitative Research; 1993. Available online: <https://www.industrydocuments.ucsf.edu/docs/frbl0122> (accessed on 10 March 2022).
35. Curtis, J. Alternative Pack Concepts for Kim, a New Female-Oriented Cigarette—A Unifocus Study. 1985. Available online: <https://www.industrydocuments.ucsf.edu/docs/qxkd0132> (accessed on 10 March 2022).
36. Carter, S. Summary Analysis of Eight Focus Discussion Groups on Cigarette 12 Pack for Lorillard (861100). Available online: <https://www.industrydocuments.ucsf.edu/docs/#id=xnll0115> (accessed on 28 November 2021).
37. Paul, A. Warner Associates Management Summary on Reactions to New Creative, Packaging and Promotions for Salem and Salem Box. 1990. Available online: <https://www.industrydocuments.ucsf.edu/docs/#id=zzhg0059> (accessed on 28 November 2021).
38. Gomez, M.L. Consumer Research Report. In Islandwide Tracking Study May 1996 (19960500). Consumerresearch report. Mpr no. pr003/96. Islandwide Tracking Study Final Report. 1996. Available online: <https://www.industrydocumentslibrary.ucsf.edu/tobacco/docs/qjwv0187> (accessed on 10 March 2022).
39. Burke Marketing Research. *Burke Marketing Research Package Size Evaluation Study*; Burke, Inc.: Cincinnati, OH, USA, 1983.
40. Generation Idea. Semi-Rigid Package Study. A Qualitative Exploration of Consumer Reactions to a New Type of Packaging for Cigarettes; Burke, Inc.: Cincinnati, OH, USA, 1986.
41. Market Research Document. *Segmentation—Phase I—Focus Group Research—Ontario/Quebec*; Burke, Inc.: Cincinnati, OH, USA, 1991.
42. Shoi Balaban Dickinson Research Inc. *An Exploratory Study—Pricing: Price-Conscious vs. Non-Price conscious Smokers*; Shoi Balaban Dickinson Research Inc.: Ft. Lauderdale, FL, USA, 1983.
43. Cox, A. Twelve Pack Focus Groups. 1983. Available online: <https://www.industrydocuments.ucsf.edu/docs/styp0094> (accessed on 28 November 2021).
44. Ellison Quarterly Research. A Qualitative Analysis. Camel New Product Concept Screening Exploration. 1991. Available online: <https://www.industrydocuments.ucsf.edu/docs/fnvp0081> (accessed on 28 November 2021).
45. Stern, D. Cartier in-Store Test. 1990. Available online: <https://www.industrydocuments.ucsf.edu/docs/pkkg0129> (accessed on 28 November 2021).
46. Causey, R. Kent Qualitative Research—Paraguay. 1982. Available online: <https://industrydocuments.library.ucsf.edu/tobacco/docs/ftcf01146> (accessed on 28 November 2021).
47. Sirriyeh, R.; Lawton, R.; Gardner, P.; Armitage, G. Reviewing studies with diverse designs: The development and evaluation of a new tool. *J. Eval. Clin. Pract.* **2012**, *18*, 746–752. <https://doi.org/10.1111/j.1365-2753.2011.01662.x>.
48. Vyth, E.L.; Steenhuis, I.H.; Brandt, H.E.; Roodenburg, A.J.; Brug, J.; Seidell, J.C. Methodological quality of front-of-pack labeling studies: A review plus identification of research challenges. *Nutr. Rev.* **2012**, *70*, 709–720. <https://doi.org/10.1111/j.1753-4887.2012.00535.x>.
49. Hughes, N.; Arora, M.; Grills, N. Perceptions and impact of plain packaging of tobacco products in low and middle income countries, middle to upper income countries and low-income settings in high-income countries: A systematic review of the literature. *BMJ Open* **2016**, *6*, e010391. <https://doi.org/10.1136/bmjopen-2015-010391>.
50. Adam, A.; Jensen, J.D. What is the effectiveness of obesity related interventions at retail grocery stores and supermarkets? -a systematic review. *BMC Public Health* **2016**, *16*, 1247. <https://doi.org/10.1186/s12889-016-3985-x>.
51. Finch, K.; Lawrence, D.; Williams, M.O.; Thompson, A.R.; Hartwright, C. A Systematic Review of the Effectiveness of Safewards: Has Enthusiasm Exceeded Evidence? *Issues Ment. Health Nurs.* **2022**, *43*, 119–136. <https://doi.org/10.1080/01612840.2021.1967533>.
52. Paul, A. Warner Associates. Management Summary of Findings on New Menthol Brand Packaging, Premiums and Promotional Concept. 1990. Available online: <https://www.industrydocuments.ucsf.edu/docs/zzhg0059> (accessed on 28 November 2021).

53. Singh, M.D.V.; Kumar, R.; Kumar, A.M. 'Loose' cigarettes association with intensity of smoking: A secondary data analysis from Global Adult Tobacco survey, India 2009–2010. *J. Sci. Soc.* **2017**, *44*, 26–30.
54. Dangol, G.; Poudel, K.C.; Kim-Mozeleski, J.E. The Role of Parental Involvement in Cigarette Smoking among Adolescents in Nepal. *J. Psychoact. Drugs* **2022**, *54*, 110–118. <https://doi.org/10.1080/02791072.2021.1923875>.
55. Ekpu, V.U.; Brown, A.K. The Economic Impact of Smoking and of Reducing Smoking Prevalence: Review of Evidence. *Tob. Use Insights* **2015**, *8*, 1–35. <https://doi.org/10.4137/tui.S15628>.
56. National Center for Chronic Disease Prevention and Health Promotion (US) Office on Smoking and Health. 5, The Tobacco Industry's Influences on the Use of Tobacco Among Youth. In *Preventing Tobacco Use Among Youth and Young Adults: A Report of the Surgeon General*; Centers for Disease Control and Prevention (US): Atlanta, GA, USA, 2012.
57. Department of Psychology, University of Waterloo. *International Tobacco Control (ITC) Policy Evaluation Project: ITC Malaysia Wave 1–4 National Report (2005–2009)*; University of Waterloo: Waterloo, Canada, 2012.
58. van Schalkwyk, M.C.I.; McKee, M.; Been, J.V.; Millett, C.; Filippidis, F.T. Size matters: An analysis of cigarette pack sizes across 23 European Union countries using Euromonitor data, 2006 to 2017. *PLoS ONE* **2020**, *15*, e0237513. <https://doi.org/10.1371/journal.pone.0237513>.
59. Page, M.J.; McKenzie, J.E.; Bossuyt, P.M.; Boutron, I.; Hoffmann, T.C.; Mulrow, C.D.; Shamseer, L.; Tetzlaff, J.M.; Akl, E.A.; Brennan, S.E.; et al. The PRISMA 2020 statement: an updated guideline for reporting systematic reviews. *BMJ* **2021**, *372*, n71. <https://doi.org/10.1136/bmj.n71>.
