# Supplementary material for: Small/Kiddie Cigarette Packaging Size and Its Impact on Smoking: A Systematic Review
Source: MDPI journal article supplement (doi:10.3390/ijerph191912051), 2022-09-23
Supplement: s1 [file s1]

**Table S2.** Search terms used. Contains search terms used for database literature search.

| Key Search Strategy                                                                                                                                                                                                                                                                                                                                                                                                                                                                                                                                                                                                                                                                                                                                                                                                                                                                                                                                                                                                                                                                                                                                                                                                                                                                                                                                                                                                                                                                                                                                                                                                                                                                                                                                                                                                                                                                                                                                                                                                                                                                                                                                                                                                                                                                                                                                                                                                                                                                                                                                                                                                                                                                                                                                                                                                                                                                | Search Date      |
|------------------------------------------------------------------------------------------------------------------------------------------------------------------------------------------------------------------------------------------------------------------------------------------------------------------------------------------------------------------------------------------------------------------------------------------------------------------------------------------------------------------------------------------------------------------------------------------------------------------------------------------------------------------------------------------------------------------------------------------------------------------------------------------------------------------------------------------------------------------------------------------------------------------------------------------------------------------------------------------------------------------------------------------------------------------------------------------------------------------------------------------------------------------------------------------------------------------------------------------------------------------------------------------------------------------------------------------------------------------------------------------------------------------------------------------------------------------------------------------------------------------------------------------------------------------------------------------------------------------------------------------------------------------------------------------------------------------------------------------------------------------------------------------------------------------------------------------------------------------------------------------------------------------------------------------------------------------------------------------------------------------------------------------------------------------------------------------------------------------------------------------------------------------------------------------------------------------------------------------------------------------------------------------------------------------------------------------------------------------------------------------------------------------------------------------------------------------------------------------------------------------------------------------------------------------------------------------------------------------------------------------------------------------------------------------------------------------------------------------------------------------------------------------------------------------------------------------------------------------------------------|------------------|
| <p><b>The databases include Pubmed, Scopus, Web of Science, The Cochrane Central Register of Controlled Trials(CENTRAL) and EMBASE.</b></p> <p><b>Keywords for Pubmed:</b><br/>           ((smoke* OR tobacco* OR cigarette* OR smoking OR (smoking[MeSH Terms]) OR (cigarette smoking[MeSH Terms])) AND (("small pack*" OR "kiddie pack*" OR "mini pack" OR "small box*" OR "12-pack" OR "12's" OR "14-pack" OR "14's" OR "10-pack" OR "10's" OR "5-pack" OR "5's" OR "15-pack" OR "15's" OR "pack sizes" OR "pack size" OR "package size")) AND ("smoking initiat*" OR "urge to buy" OR "impulse" OR "smoking reduc*" OR "intend" OR "desire" OR "consump*" OR (smoking reduction[MeSH Terms]) OR (smoking behaviors[MeSH Terms]) OR (smoking habit[MeSH Terms])))</p> <p><b>Keywords for Cochrane:</b><br/>           (("small pack*" OR "kiddie pack*" OR "mini pack" OR "small box*" OR "15-pack" OR "15's" OR "12-pack" OR "12's" OR "14-pack" OR "14's" OR "10-pack" OR "10's" OR "5-pack" OR "5's" OR "pack sizes" OR "pack size" OR "package size" OR packet)) AND (smoke* OR tobacco* OR cigarette* OR smoking ) AND ("smoking initiat*" OR "urge to buy" OR "impulse" OR "smoking reduc*" OR "intend" OR "desire" OR "consump*")</p> <p><b>Keywords for Embase:</b><br/>           ('small pack*' OR 'kiddie pack*' OR 'mini pack' OR 'small box*' OR '15-pack' OR '15` s' OR '12-pack' OR '12` s' OR '14-pack' OR '14` s' OR '10-pack' OR '10` s' OR '5-pack' OR '5` s' OR 'pack sizes' OR 'pack size' OR 'package size' OR packet ) AND ('smoking initiat*' OR 'urge to buy' OR 'impulse' OR 'smoking reduc*' OR 'intend' OR 'desire' OR 'consump*') AND (smoke* OR tobacco* OR cigarette* OR smoking OR 'smoking'/exp OR 'cigarette smoking'/exp)</p> <p><b>Keywords for Web of Science:</b><br/>           ((ALL=((("small pack*" OR "kiddie pack*" OR "mini pack" OR "small box*" OR "15-pack" OR "15's" OR "12-pack" OR "12's" OR "14-pack" OR "14's" OR "10-pack" OR "10's" OR "5-pack" OR "5's" OR "pack sizes" OR "pack size" OR "package size" OR packet)))) AND ALL=((smoke* OR tobacco* OR cigarette* OR smoking ))) AND ALL=((("smoking initiat*" OR "urge to buy" OR "impulse" OR "smoking reduc*" OR "intend" OR "desire" OR "consump*")))</p> <p><b>Keywords for Scopus:</b><br/>           ( TITLE-ABS-KEY ( {small pack}<br/>             OR {kiddie pack*} OR {mini pack} OR {small box*} OR {15-pack} OR {15's} OR {12-pack}<br/>             OR {12's} OR {14-pack} OR {14's} OR {10-pack} OR {10's} OR {5-pack} OR {5's} OR {pack<br/>             sizes} OR {pack size} OR {package size} OR packet ) AND TITLE-ABS-KEY ( smoke* OR<br/>             tobacco* OR cigarette* OR smoking ) AND TITLE-ABS-KEY ( "smoking initiat*" OR "urge to<br/>             buy" OR "impulse" OR "smoking reduc*" OR "intend" OR "desire" OR "consump*" ) )</p> | 27 November 2021 |
|                                                                                                                                                                                                                                                                                                                                                                                                                                                                                                                                                                                                                                                                                                                                                                                                                                                                                                                                                                                                                                                                                                                                                                                                                                                                                                                                                                                                                                                                                                                                                                                                                                                                                                                                                                                                                                                                                                                                                                                                                                                                                                                                                                                                                                                                                                                                                                                                                                                                                                                                                                                                                                                                                                                                                                                                                                                                                    |                  |
